# 1 **Investigation of factors associated with delayed initiation of** 2 **breastfeeding in Papua New Guinea: a cross-sectional study**

3  
4 McKenzie Maviso,<sup>1\*</sup> Francis Pulsan,<sup>2</sup> Lisa M. Vallely<sup>3</sup>

5  
6  
7 <sup>1</sup>Division of Public Health, School of Medicine and Health Sciences, University of Papua New  
8 Guinea, Port Moresby, Papua New Guinea

9 <sup>2</sup>Division of Clinical Sciences, School of Medicine and Health Sciences, University of Papua  
10 New Guinea, Port Moresby, Papua New Guinea

11 <sup>3</sup>Asia and Pacific Health Program, Kirby Institute, UNSW Sydney, Australia

12  
13 \*Correspondence to McKenzie Maviso; [mckenzie.maviso@upng.ac.pg](mailto:mckenzie.maviso@upng.ac.pg)

## 14 15 **Abstract**

16 **Background** Breastfeeding within the first hour of birth is critical for newborn survival.  
17 However, in Papua New Guinea (PNG), about 40% of newborns are not breastfed within the first  
18 hour of birth. This study aimed to determine the prevalence and factors associated with delayed  
19 breastfeeding initiation in PNG.

20 **Methods** This study utilised secondary data from the 2016–2018 PNG Demographic and Health  
21 Survey (DHS), a nationally representative cross-sectional study. A total weighted sample of 4748  
22 women aged 15–49 were included. Complex samples analysis was performed to determine the  
23 direction of association between the independent variables and delayed initiation of  
24 breastfeeding.

25 **Results** About a quarter (24.6%) of women delayed initiation of breastfeeding. Women with an  
26 unplanned pregnancy (AOR 1.32; 95% CI: 1.03 to 1.68), those who had a caesarean section  
27 (AOR 3.16; 95% CI: 1.39 to 7.17), those who did not initiate newborn skin-to-skin contact  
28 immediately after birth (AOR 1.83; 95% CI: 1.41 to 2.38), and those who watched television  
29 (AOR 1.39; 95% CI: 1.11 to 1.75), or were from the Momase region (AOR 1.31; 95% CI: 0.88 to

30 1.93) had higher odds of delayed breastfeeding initiation. Conversely, those who read a  
31 newspaper or magazine (AOR 0.76; 95% CI: 0.61 to 0.95), were from the Southern (AOR 0.81;  
32 95% CI: 0.56 to 1.15) and Highlands (AOR 0.86; 95% CI: 0.58 to 1.29) regions, and gave birth  
33 at home or in the village (AOR 0.69; 95% CI: 0.49 to 0.96) had lower odds of delayed initiation  
34 of breastfeeding.

35 **Conclusion** One in four women in this study delayed initiation of breastfeeding until after one  
36 hour after birth. Interventions to promote optimal breastfeeding require a multi-sectoral  
37 approach, as well as bolstering health workers' capacity to encourage and support early initiation  
38 of breastfeeding during the antenatal and early postnatal periods.

39

#### 40 **What is known about the subject**

- 41 • Early breastfeeding initiation within the first hour of birth is an important intervention to  
42 reduce childhood morbidities and mortalities.
- 43 • In PNG, 40% of newborns are not breastfed immediately or within the first hour of birth.

#### 44 **What this study adds**

- 45 • One in four women in PNG delayed early initiation of breastfeeding.
- 46 • Unplanned pregnancy, caesarean section, no newborn skin-to-skin contact immediately after  
47 birth, and exposure to media predicted delayed initiation of breastfeeding.
- 48 • Birth at home or in the village reduces the likelihood of delayed initiation of breastfeeding.

#### 49 **How this study affects research, practice or policy**

- 50 • This study seeks to promote targeted breastfeeding support for mothers, particularly in rural  
51 areas.
- 52 • Breastfeeding advocacy and promotion programmes, strengthening health workers' capacity  
53 to address factors influencing delayed initiation of breastfeeding, and promoting optimal  
54 breastfeeding practices are required.

55

56

## 57 **Introduction**

58 Scaling up breastfeeding is one of the most cost-effective interventions for improving infant and  
59 child survival and reducing under-five mortality.<sup>1</sup> Breastfeeding has the potential to save the  
60 lives of over 800 000 children under the age of five every year.<sup>2</sup> It is universally accepted and  
61 recommended that all newborn babies, irrespective of the place of birth, be placed in skin-to-skin  
62 contact with their mothers immediately after birth to promote breastfeeding initiation within the  
63 first hour of birth.<sup>3</sup> Early initiation of breastfeeding is the provision of the mother's breast milk  
64 within the first hour of birth and ensures that the newborn receives colostrum, while delayed  
65 breastfeeding initiation occurs after one hour of birth.<sup>3,4</sup>

66 Early initiation of breastfeeding has health benefits for both the infant and the mother. It  
67 provides many nutritional, immunological, and psychosocial benefits, including protection of the  
68 infant against infectious diseases and enhanced maternal-infant bonding.<sup>3</sup> For the mothers, early  
69 initiation of breastfeeding promotes the release of oxytocin for uterine contractions to prevent  
70 postpartum haemorrhage.<sup>5,6</sup> In addition, initiation of breastfeeding within the first hour and  
71 breastfeeding exclusively for up to six months has been shown to lower the odds of cancer,  
72 diabetes (Type 2), and cardiovascular diseases, including maternal mortality.<sup>7-9</sup>

73 Despite the established health benefits of early initiation of breastfeeding, a higher rate of  
74 suboptimal breastfeeding remains in low- and middle-income countries (LMICs).<sup>4,10</sup> There is  
75 also increasing evidence that delayed initiation of breastfeeding (after the first hour of birth) has  
76 been associated with neonatal infections and illnesses,<sup>4,7,11</sup> and increased newborn and child  
77 mortality.<sup>7,11</sup> Findings from a systematic review revealed that initiating breastfeeding between 2  
78 and 23 hours after birth increased the risk of neonatal death by 33% compared to breastfeeding  
79 within the first hour of birth.<sup>11</sup> The delay in initiating breastfeeding was also found to increase  
80 the risk of respiratory diseases, including breathing difficulty during the first 6 months.<sup>11</sup> This  
81 can influence breastfeeding and negatively affect its continuation into infancy.

82 In Papua New Guinea (PNG), the rate of early initiation of breastfeeding is around  
83 60%,<sup>12</sup> suggesting that 40% of newborns are at higher risk of morbidity and mortality throughout  
84 their infancy and early childhood years. Earlier work from PNG has identified low rates of early  
85 initiation of breastfeeding are associated with factors such as younger maternal age, lack of  
86 breastfeeding knowledge and support, lack of antenatal education, place and mode of birth,  
87 grandmothers' involvement, and socio-cultural norms.<sup>12-14</sup> While there are few studies in PNG

88 on infant feeding practices<sup>14–16</sup> including early breastfeeding initiation,<sup>12</sup> there is a paucity of  
89 information concerning factors predisposing to delayed initiation of breastfeeding.  
90 Understanding the factors that influence the delay in initiating breastfeeding is crucial for  
91 designing interventions to improve breastfeeding outcomes in line with the country’s *Infant and*  
92 *Young Child Feeding Policy*.<sup>17</sup> Therefore, this study aimed to determine the prevalence and  
93 factors associated with delayed initiation of breastfeeding in PNG.

## 94 **Methods**

### 95 **Study design and data source**

96 This study used secondary data from the 2016–2018 PNG Demographic and Health Survey  
97 (DHS), a nationally representative cross-sectional survey that collected demographic and health-  
98 related data across the country’s four major administrative regions: Southern, Highlands,  
99 Momase, and Islands.<sup>18</sup> The current DHS was the second round of surveys conducted in the  
100 country by the National Statistical Office (NSO) with financial and technical assistance from  
101 Inner City Fund (ICF) International through The DHS Program, funded by the United States  
102 Agency for International Development (USAID). For sampling, the DHS used a two-stage  
103 stratified sampling procedure to sample census units from each stratum. In the first stage, 800  
104 census units were within each sampling stratum to achieve implicit stratification and proportional  
105 allocation via a probability proportional-to-size selection. The second stage involved  
106 systematically selecting 24 households from each cluster using probability sampling, producing  
107 19 200 households.<sup>18</sup> In the interviewed households, 18 175 women aged 15–49 were identified  
108 for individual interviews, of which 15 198 women were interviewed successfully (a response rate  
109 of 84%). For this study, a weighted sample of 4748 women who had given birth three years  
110 before the survey and had complete information on the variables of interest was included.  
111 Information about the methodology, pretesting, sampling design, and selection is available in the  
112 final report<sup>18</sup> and can be accessed online at [https://dhsprogram.com/publications/publication-](https://dhsprogram.com/publications/publication-fr364-dhs-final-reports.cfm)  
113 [fr364-dhs-final-reports.cfm](https://dhsprogram.com/publications/publication-fr364-dhs-final-reports.cfm).

114

## 115 **Variable Measurement**

### 116 **Dependent variable**

117 The dependent variable of interest was “delayed” initiation of breastfeeding. Information  
118 regarding the timing of initiation of breastfeeding was obtained from women using the question,  
119 “How long after birth did you first put (name of child) to the breast?” The dataset included four  
120 responses for breastfeeding initiation: “immediately,” “within the first hour,” “hours,” and  
121 “days.” A new variable for the time of initiation of breastfeeding was generated and  
122 dichotomized as “1” for “early” (immediately or within the first hour of birth), and “2” for  
123 “delayed” (any time after the first hour of birth).

### 124 **Independent variables**

125 The selection of the variables from potential confounders of delayed initiation of breastfeeding  
126 was identified in previous studies.<sup>4,10,19</sup> Variable selection also depended on the availability of  
127 relevant data in the 2016–2018 PNGDHS. Potential individual and group-level factors associated  
128 with delayed initiation of breastfeeding are presented in the conceptual framework to guide the  
129 conceptualization (**figure 1**). The conceptual framework summarises selected independent  
130 variables at two levels that influenced the delay in breastfeeding initiation. Individual-level  
131 factors relate directly to the mother and infant and include maternal age, marital status, last  
132 pregnancy planned, education, occupation, place of residence and region. Infant characteristics  
133 include the infant’s sex, birth weight, birth size, birth order, newborn skin-to-skin contact  
134 immediately after birth, and prelacteal feeds. In addition, group-level factors are directly related  
135 to household and healthcare settings. Household characteristics include the husband’s education  
136 and occupation, wealth index, reading a newspaper or magazine, listening to the radio, and  
137 watching television, whereas health service characteristics include access to and utilisation of  
138 maternal and child health services, such as antenatal care visits, mode of birth, and place of birth  
139 (see **figure 1**).

### 140 **Statistical analysis**

141 The extracted data was cleaned and all the missing observations were dropped while  
142 subcategories of variables with small observations were merged. The final sample data was  
143 weighted to restore representativeness and produce a reliable estimate and standard error.

144 Descriptive statistics were computed and reported as weighted frequencies and percentages.  
145 Bivariate associations between predictors and delayed breastfeeding initiation were performed to  
146 determine the strength of association using Pearson's chi-square test. Only significant variables  
147 from the bivariate analyses were entered into the multivariable logistic regression model. To  
148 account for the cluster sampling design and sample weight and provide generalizable and  
149 accurate estimates of proportion, probability values, and odds ratios,<sup>20</sup> the complex samples  
150 analysis technique was applied. The Hosmer-Lemeshow goodness-of-fit was used to test for  
151 model fitness. Adjusted Odds Ratios (AORs) with 95% Confidence Intervals (CIs) are reported.  
152 A  $p \leq 0.05$  was considered statistically significant. Data were analysed using IBM SPSS Statistics  
153 for Windows, Version 22.0 (IBM Corp., Armonk, NY, USA).

#### 154 **Patient and public involvement**

155 Patients and/or the public were not involved in the design, conduct, reporting or dissemination of  
156 this research.

## 157 **Results**

### 158 **Characteristics of the study population**

159 **Table 1** presents the characteristics of the participants. A total weighted sample of 4748 women  
160 was included in the analysis. The mean (standard deviation) maternal age was 29.9 ( $\pm 7.0$ ) years.  
161 Overall, 1177 [24.6% (95% CI: 23 to 26)] of women delayed initiation of breastfeeding, which  
162 remained high in rural areas (88.3%). Half (50%) had attained primary education. More than  
163 two-thirds were not working (68.3%) and were living in rural areas (88.3%). Regarding maternal  
164 health factors, the majority of women had planned their last pregnancies (75.6%); more than half  
165 had received four or more antenatal visits (55.9%) and 61% gave birth in a health facility. In  
166 addition, over half of the women read newspapers/magazines (50.9%) and listened to radio  
167 (54.1%). Regarding infant-related factors, nearly all the newborns weighed over 2500g (81.4%)  
168 and 61.3% had no skin-to-skin contact immediately after birth. In Chi-square analysis, maternal  
169 age, last pregnancy planned, region of residence, husband's education, wealth index, reading a  
170 newspaper or magazine, watching television, number of antenatal care visits, mode of birth,  
171 place of birth, birth size, birth order, newborn skin-to-skin contact, and prelacteal feeding were  
172 factors significantly associated with delayed breastfeeding initiation ( $p < 0.05$ ).

**Table 1 Characteristics of the participants**

| Variables                                     | All participants<br>N (%) | Delayed initiation of<br>breastfeeding<br>n (%) | p-value*         |
|-----------------------------------------------|---------------------------|-------------------------------------------------|------------------|
| <b>Total</b>                                  | <b>4748 (100)</b>         | <b>1177 (24.6)</b>                              |                  |
| <b><u>Maternal characteristics</u></b>        |                           |                                                 |                  |
| Age (years)                                   |                           |                                                 | <b>0.025</b>     |
| Mean (Standard deviation) = 29.9 ( $\pm$ 7.0) |                           |                                                 |                  |
| 15–24                                         | 1200 (25.3)               | 269 (22.9)                                      |                  |
| 25–34                                         | 2278 (48.0)               | 557 (47.3)                                      |                  |
| 35–44                                         | 1129 (23.7)               | 313 (26.6)                                      |                  |
| 45–49                                         | 141 (3.0)                 | 38 (3.2)                                        |                  |
| Marital status                                |                           |                                                 | 0.261            |
| Never married                                 | 149 (3.1)                 | 32 (2.7)                                        |                  |
| Married                                       | 4312 (90.8)               | 1083 (92.0)                                     |                  |
| Divorced/Separated                            | 287 (6.1)                 | 62 (5.3)                                        |                  |
| Last pregnancy planned                        |                           |                                                 | <b>&lt;0.001</b> |
| Yes                                           | 3803 (80.1)               | 890 (75.6)                                      |                  |
| No                                            | 945 (19.9)                | 287 (24.4)                                      |                  |
| Education (maternal)                          |                           |                                                 | 0.641            |
| No formal education                           | 1238 (26.1)               | 310 (26.3)                                      |                  |
| Primary                                       | 2404 (50.7)               | 589 (50.0)                                      |                  |
| Secondary                                     | 952 (20.0)                | 246 (20.9)                                      |                  |
| Higher                                        | 154 (3.2)                 | 33 (2.8)                                        |                  |
| Occupation (maternal)                         |                           |                                                 | 0.266            |
| Not working                                   | 3304 (69.6)               | 804 (68.3)                                      |                  |
| Working                                       | 1443 (30.4)               | 373 (31.7)                                      |                  |
| Region                                        |                           |                                                 | <b>&lt;0.001</b> |
| Southern                                      | 989 (20.8)                | 223 (18.9)                                      |                  |

|                                         |             |             |              |
|-----------------------------------------|-------------|-------------|--------------|
| Highlands                               | 1799 (37.9) | 391 (33.2)  |              |
| Momase                                  | 1291 (27.2) | 377 (32.1)  |              |
| Islands                                 | 669 (14.1)  | 186 (15.8)  |              |
| <b>Place of residence</b>               |             |             | <b>0.190</b> |
| Urban                                   | 508 (10.7)  | 138 (11.7)  |              |
| Rural                                   | 4239 (89.3) | 1039 (88.3) |              |
| <b><u>Household characteristics</u></b> |             |             |              |
| Education (husband) ( <i>n</i> = 4250)  |             |             | <b>0.014</b> |
| No formal education                     | 969 (22.8)  | 216 (20.3)  |              |
| Primary                                 | 1847 (43.5) | 480 (45.1)  |              |
| Secondary                               | 1144 (26.9) | 310 (29.1)  |              |
| Higher                                  | 289 (6.8)   | 59 (5.5)    |              |
| Occupation (husband) ( <i>n</i> = 4189) |             |             | <b>0.868</b> |
| Not working                             | 2157 (51.5) | 539 (51.7)  |              |
| Working                                 | 2032 (48.5) | 503 (48.3)  |              |
| Wealth index                            |             |             | <b>0.017</b> |
| Poorest                                 | 1027 (21.6) | 221 (18.8)  |              |
| Poorer                                  | 992 (20.9)  | 245 (20.8)  |              |
| Middle                                  | 970 (20.1)  | 234 (19.9)  |              |
| Richer                                  | 956 (20.1)  | 253 (21.5)  |              |
| Richest                                 | 803 (16.9)  | 225 (19.1)  |              |
| Read a newspaper or magazine            |             |             | <b>0.051</b> |
| Yes                                     | 2531 (53.3) | 599 (50.9)  |              |
| No                                      | 2217 (46.7) | 578 (49.1)  |              |
| Listen to radio                         |             |             | <b>0.232</b> |
| Yes                                     | 2498 (52.6) | 637 (54.1)  |              |
| No                                      | 2250 (47.4) | 540 (45.9)  |              |
| Watch television                        |             |             | <b>0.008</b> |
| Yes                                     | 2085 (43.9) | 556 (47.2)  |              |



|                                              |             |             |                  |
|----------------------------------------------|-------------|-------------|------------------|
| No                                           | 2662 (56.1) | 621 (52.8)  |                  |
| <b><u>Health service characteristics</u></b> |             |             |                  |
| Number of antenatal care visits              |             |             | <b>&lt;0.001</b> |
| No visits                                    | 1102 (23.2) | 222 (18.9)  |                  |
| 1–3                                          | 1127 (23.7) | 297 (25.2)  |                  |
| 4 or more                                    | 2519 (53.1) | 658 (55.9)  |                  |
| Mode of birth                                |             |             | <b>&lt;0.001</b> |
| Caesarean                                    | 131 (2.8)   | 68 (5.8)    |                  |
| Vaginal                                      | 4617 (97.2) | 1109 (94.2) |                  |
| Place of birth                               |             |             | <b>0.012</b>     |
| Home/village                                 | 2000 (42.1) | 459 (39.0)  |                  |
| Health facility                              | 2748 (57.9) | 718 (61.0)  |                  |
| <b><u>Infant characteristics</u></b>         |             |             |                  |
| Sex of the child ( <i>n</i> = 3178)          |             |             | 0.858            |
| Male                                         | 1653 (52.0) | 393 (52.3)  |                  |
| Female                                       | 1525 (48.0) | 358 (47.7)  |                  |
| Birth weight (g) ( <i>n</i> = 2400)          |             |             | 0.579            |
| <2500                                        | 430 (17.9)  | 118 (18.6)  |                  |
| >2500                                        | 1970 (82.1) | 515 (81.4)  |                  |
| Birth size ( <i>n</i> = 4562)                |             |             | <b>0.009</b>     |
| Small                                        | 875 (19.2)  | 217 (19.2)  |                  |
| Average                                      | 1942 (42.6) | 442 (39.0)  |                  |
| Large                                        | 1744 (38.2) | 473 (41.8)  |                  |
| Birth order                                  |             |             | <b>0.012</b>     |
| 1 <sup>st</sup>                              | 1008 (21.2) | 246 (20.9)  |                  |
| 2 <sup>nd</sup>                              | 960 (20.2)  | 236 (20.1)  |                  |
| 3 <sup>rd</sup>                              | 853 (18.0)  | 179 (15.2)  |                  |
| 4 <sup>th</sup> or more                      | 1926 (40.6) | 516 (43.8)  |                  |
| Newborn skin-to-skin contact                 |             |             | <b>&lt;0.001</b> |

|                                           |             |                  |
|-------------------------------------------|-------------|------------------|
| Yes                                       | 2179 (45.9) | 456 (38.7)       |
| No                                        | 2569 (54.1) | 721 (61.3)       |
| Prelacteal feeds given ( <i>n</i> = 4532) |             | <b>&lt;0.001</b> |
| Yes                                       | 402 (8.9)   | 138 (12.0)       |
| No                                        | 4130 (91.1) | 1013 (88.0)      |

\*Chi-square test,  $p < 0.05$

174

## 175 Factors associated with delayed initiation of breastfeeding

176 **Table 2** presents the multivariable analysis of determinants of delayed initiation of  
 177 breastfeeding. Last pregnancy planned, reading a newspaper or magazine, watching television,  
 178 region, mode of birth, place of birth, and newborn skin-to-skin contact immediately after birth  
 179 were associated with delayed initiation of breastfeeding. In the multivariable analysis, the odds  
 180 of delayed initiation of breastfeeding remained higher among women with an unplanned  
 181 pregnancy (AOR 1.32; 95% CI: 1.03 to 1.68,  $p=0.030$ ), those who had a caesarean section (AOR  
 182 3.16; 95% CI: 1.39 to 7.17,  $p=0.006$ ), those who did not have initiate newborn skin-to-skin  
 183 contact immediately after birth (AOR 1.83; 95% CI: 1.41 to 2.38,  $p < 0.001$ ), and those who  
 184 watched television (AOR 1.39; 95% CI: 1.11 to 1.75,  $p=0.004$ ), or were from the Momase region  
 185 (AOR 1.31; 95% CI: 1.00 to 1.93). Conversely, women who read a newspaper or magazine  
 186 (AOR 0.76; 95% CI: 0.61 to 0.95,  $p=0.018$ ), were from the Southern (AOR 0.81; 95% CI: 0.56  
 187 to 1.15,  $p=0.041$ ) and Highlands (AOR 0.86; 95% CI: 0.58 to 1.29,  $p=0.041$ ) regions, and gave  
 188 birth at home or in the village (AOR 0.69; 95% CI: 0.49 to 0.96,  $p=0.028$ ), had lower odds of  
 189 delaying initiation of breastfeeding. The study found no significant correlation between the  
 190 number of antenatal care visits, birth size, birth order, prelacteal feeding and delayed initiation of  
 191 breastfeeding.

192

**Table 2 Multivariable analysis of factors associated with delayed initiation of breastfeeding in PNG**

| Variables   | COR (95% CI)        | AOR (95% CI)        | p-value* |
|-------------|---------------------|---------------------|----------|
| Age (years) |                     |                     | 0.710    |
| 19–24       | 0.76 (0.42 to 1.36) | 0.71 (0.37 to 1.34) |          |

|                                        |                     |                     |              |
|----------------------------------------|---------------------|---------------------|--------------|
| 25–34                                  | 0.84 (0.49 to 1.42) | 0.83 (0.48 to 1.45) |              |
| 35–44                                  | 0.98 (0.55 to 1.75) | 0.87 (0.49 to 1.56) |              |
| 45–49                                  | Ref.                | Ref.                |              |
| <b>Last pregnancy planned</b>          |                     |                     | <b>0.030</b> |
| Yes                                    | Ref.                | Ref.                |              |
| No                                     | 1.44 (1.10 to 1.89) | 1.32 (1.03 to 1.68) |              |
| <b>Educational level (husband)</b>     |                     |                     | <b>0.473</b> |
| No formal education                    | 1.14 (0.66 to 1.96) | 1.51 (0.77 to 2.93) |              |
| Primary                                | 1.35 (0.83 to 2.19) | 1.61 (0.88 to 2.96) |              |
| Secondary                              | 1.40 (0.79 to 2.49) | 1.52 (0.83 to 2.78) |              |
| Higher                                 | Ref.                | Ref.                |              |
| <b>Wealth index</b>                    |                     |                     | <b>0.761</b> |
| Poorest                                | 0.70 (0.46 to 1.07) | 0.73 (0.45 to 1.21) |              |
| Poorer                                 | 0.84 (0.56 to 1.25) | 0.86 (0.55 to 1.36) |              |
| Middle                                 | 0.82 (0.56 to 1.20) | 0.81 (0.54 to 1.23) |              |
| Richer                                 | 0.92 (0.64 to 1.34) | 0.87 (0.59 to 1.29) |              |
| Richest                                | Ref.                | Ref.                |              |
| <b>Read a newspaper or magazine</b>    |                     |                     | <b>0.018</b> |
| Yes                                    | 0.86 (0.69 to 1.07) | 0.76 (0.61 to 0.95) |              |
| No                                     | Ref.                | Ref.                |              |
| <b>Watch the television</b>            |                     |                     | <b>0.004</b> |
| Yes                                    | 0.89 (0.65 to 1.21) | 1.39 (1.11 to 1.75) |              |
| No                                     | Ref.                | Ref.                |              |
| <b>Region</b>                          |                     |                     | <b>0.041</b> |
| Southern                               | 0.74 (0.54 to 1.02) | 0.81 (0.56 to 1.15) |              |
| Highlands                              | 0.74 (0.52 to 1.04) | 0.86 (0.58 to 1.29) |              |
| Momase                                 | 1.08 (0.74 to 1.56) | 1.31 (1.00 to 1.93) |              |
| Islands                                | Ref.                | Ref.                |              |
| <b>Number of antenatal care visits</b> |                     |                     | <b>0.113</b> |

|                                   |                     |                     |                  |
|-----------------------------------|---------------------|---------------------|------------------|
| No visits                         | 0.70 (0.53 to 0.94) | 0.76 (0.54 to 1.06) |                  |
| 1–3                               | 1.05 (0.79 to 1.38) | 1.14 (0.90 to 1.44) |                  |
| 4 or more                         | Ref.                | Ref.                |                  |
| Mode of birth                     |                     |                     | <b>0.006</b>     |
| Caesarean                         | 3.68 (1.64 to 8.29) | 3.16 (1.39 to 7.17) |                  |
| Vaginal                           | Ref.                | Ref.                |                  |
| Place of birth                    |                     |                     | <b>0.028</b>     |
| Home/village                      | 0.83 (0.64 to 1.07) | 0.69 (0.49 to 0.96) |                  |
| Health facility                   | Ref.                | Ref.                |                  |
| Birth size                        |                     |                     | 0.343            |
| Small                             | 0.89 (0.66 to 1.19) | 0.93 (0.69 to 1.24) |                  |
| Average                           | 0.79 (0.62 to 1.02) | 0.84 (0.67 to 1.06) |                  |
| Large                             | Ref.                | Ref.                |                  |
| Birth order                       |                     |                     | 0.338            |
| 1 <sup>st</sup>                   | 0.88 (0.68 to 1.12) | 0.93 (0.61 to 1.42) |                  |
| 2 <sup>nd</sup>                   | 0.94 (0.69 to 1.28) | 1.02 (0.73 to 1.43) |                  |
| 3 <sup>rd</sup>                   | 0.72 (0.53 to 0.98) | 0.77 (0.56 to 1.08) |                  |
| 4 <sup>th</sup> or more           | Ref.                | Ref.                |                  |
| Newborn skin-to-skin contact      |                     |                     | <b>&lt;0.001</b> |
| Yes                               | Ref.                | Ref.                |                  |
| No                                | 1.50 (1.19 to 1.88) | 1.83 (1.41 to 2.38) |                  |
| Prelacteal feeds given to infants |                     |                     | 0.076            |
| Yes                               | 1.71 (1.08 to 2.72) | 1.44 (0.96 to 2.15) |                  |
| No                                | Ref.                | Ref.                |                  |

Ref. = Reference category; COR = Crude Odds Ratio; AOR = Adjusted Odds Ratio; \*p≤0.05

193

## 194 Discussion

195 This study sought to determine the prevalence of delayed initiation of breastfeeding in

196 PNG and to examine the association between household, maternal, child, and health services

197 determinants. Women who watched television, were from the Momase region, had not planned  
198 their last pregnancies, had a caesarean section, and had no newborn skin-to-skin contact  
199 immediately after birth were more likely to experience a delay in initiating breastfeeding. The  
200 findings in this study underscore the demand for tailored program interventions to improve  
201 breastfeeding initiation practices, particularly among rural women.

202 While timely breastfeeding initiation is crucial for the growth and survival of infants, the  
203 practice remains suboptimal in PNG. In this study, about one-quarter (24.7%) of women have  
204 delayed breastfeeding initiation. This result was lower than the findings from an earlier study in  
205 PNG,<sup>12</sup> including those in Bangladesh,<sup>4</sup> South Sudan,<sup>21</sup> and Uganda.<sup>22</sup> The variation in  
206 prevalence may be due to sample size, maternal socio-demographic factors (i.e., socio-economic  
207 status, educational status, social norms and beliefs concerning breastfeeding practice), and health  
208 service utilisation.

209 Findings from this study revealed that women with unplanned pregnancies were more  
210 likely to delay initiation of breastfeeding. This is in agreement with studies done in sub-Saharan  
211 Africa.<sup>23</sup> Women who have unplanned pregnancies likely underutilise maternal health services,  
212 such as family planning and antenatal care, which often include appropriate information and  
213 education on breastfeeding for pregnant women.<sup>24,25</sup> Despite this finding, the increased odds of  
214 delayed initiation of breastfeeding with unplanned pregnancies among women in PNG are an  
215 observation that would require further qualitative inquiry.

216 Caesarean section was positively associated with delayed initiation of breastfeeding in  
217 this study, consistent with several studies conducted elsewhere.<sup>26-28</sup> Women who underwent  
218 caesarean section were three times more likely to have a delayed initiation of breastfeeding. This  
219 could be explained by the hospital practice of separating newborns from their mothers after the  
220 procedure.<sup>28</sup> In addition, maternal exhaustion and the effects of anaesthesia following a  
221 caesarean section may impede early breastfeeding initiation.<sup>22,29</sup> While maternal recovery from  
222 this procedure generally takes some time, immediate breastfeeding is required once the woman  
223 regains consciousness and alertness.<sup>30,31</sup>

224 Interestingly, women who gave birth at home or in the village had lower odds of delayed  
225 initiation of breastfeeding compared with those who gave birth in a health facility. This was  
226 similar to findings from several LMICs,<sup>32</sup> indicating that home-birthed infants were more likely  
227 to be breastfed in the first hour of birth. The type and level of support from skilled birth

228 attendants, family members, particularly partners/husbands, and a familiar home birthing  
229 environment may reduce stress, leading to intervention-free birth, and consequently influence  
230 breastfeeding outcomes.<sup>32,33</sup> Evidence from studies conducted in PNG has demonstrated an  
231 inverse association between social and family support that adversely affects breastfeeding  
232 initiation for mothers who had given birth at home or in the village.<sup>13-15</sup> However, it is unclear  
233 what underlies the observed association between delayed initiation of breastfeeding and  
234 home/village birth in the current study. Furthermore, the association between home/village birth  
235 and breastfeeding initiation is improbable to be directly causal, which will require further  
236 research to confirm the factors driving the observed differences.

237 From the results, poor newborn skin-to-skin contact immediately after birth was  
238 significantly associated with delayed initiation of breastfeeding. Women who did not initiate  
239 skin-to-skin contact immediately after birth with their newborns were more likely to delay  
240 initiation of breastfeeding. They may be unaware of the importance of skin-to-skin contact as a  
241 means of promoting warmth and thermoregulation for their newborns, thus their lower odds of  
242 embracing and practising it.<sup>12,34</sup> The lack of information may therefore account for the delayed  
243 initiation of breastfeeding. Certain socio-cultural norms and beliefs may disapprove of these  
244 women for practising newborn skin-to-skin contact.<sup>13,15,34</sup> Furthermore, poor knowledge on the  
245 part of health workers, shortages of health workers, poor newborn care, and limited time can  
246 impede the practice of newborn skin-to-skin contact.<sup>34,35</sup> Qualitative inquiry is necessary to  
247 investigate the knowledge, attitudes, and practices regarding breastfeeding initiation among  
248 health workers and mothers, particularly those in rural settings.

249 Women who were exposed to mass media in this study, particularly television, were more  
250 likely to delay initiation of breastfeeding, consistent with studies done in sub-Saharan Africa.<sup>23,36</sup>  
251 Social marketing and advertising of infant formula feedings, milk substitutes, teats, and bottles  
252 on various media platforms have been shown to affect breastfeeding initiation.<sup>37,38</sup> In contrast,  
253 this study further revealed that women who read newspapers or magazines had lower odds of  
254 delaying breastfeeding initiation. Print media (i.e., newspapers or magazines) are available and  
255 accessible to the public compared to television, which could explain the reason for this finding.  
256 Access to print media improves information and health literacy on breastfeeding and its benefits  
257 and fosters positive behavioural beliefs about breastfeeding which have been reported as  
258 important determinants of optimal breastfeeding practice.<sup>39-41</sup> Print media can be an influential

259 tool for breastfeeding communication and promotion, for persuading breastfeeding behaviours,  
260 creating positive social norms, and garnering support from stakeholders and policymakers.<sup>40</sup>  
261 However, limited information exists on how mass media coverage influences breastfeeding  
262 practice in PNG's context. Further qualitative inquiry for a deeper understanding of mass media  
263 coverage of breastfeeding practices is necessary.

264         Regarding the region, delayed initiation of breastfeeding was not common among women  
265 from the Highlands and Southern regions. This finding is in agreement with a similar study  
266 conducted in PNG.<sup>12</sup> Expansion of access to healthcare services and ongoing economic  
267 developments in these two regions are possible explanations for this observation. On the  
268 contrary, the odds of delayed breastfeeding initiation remained higher among women from the  
269 Momase region compared to women in the Island region. This is likely attributed to the lack of  
270 qualified health workers with adequate resources in this region of the country, impeding access  
271 to maternal, newborn, and child health services as reported in similar studies.<sup>12,42</sup> This can also  
272 be elucidated in terms of the socioeconomic condition, frequently characterized by poor  
273 household wealth and low education levels, including accessibility, attitudes to antenatal care,  
274 and interpersonal issues affecting women from accessing the services provided by health workers  
275 in this region.<sup>42,43</sup> Most of the provinces in the Momase region are relatively economically  
276 unstable and geographically remote, which makes healthcare, services problematic.<sup>43</sup> The  
277 regional variations relating to breastfeeding initiation could be attributed to poor healthcare  
278 service and resource distribution. This is also consistent with previous studies, which found that  
279 variations exist in various regions and the utilisation of antenatal care services.<sup>42,43</sup> Thus, mobile  
280 and outreach programs should be strengthened to reach women, especially in rural areas and the  
281 disadvantaged.

282         This study has several strengths. It investigated household, maternal, and child factors  
283 and healthcare utilisation with delayed initiation of breastfeeding using a nationally  
284 representative survey. In addition, appropriate analysis techniques such as weighting and  
285 complex samples analysis were used to ensure that the results were representative of women in  
286 PNG. The two-stage sampling approach ensured that no selection bias could influence the results  
287 of this study. However, the study has limitations and should be interpreted with caution. As it  
288 was a cross-sectional study, the analysis could not determine a cause-and-effect relationship  
289 between breastfeeding initiation and independent variables. The role of health workers and

290 skilled birth attendants (e.g., midwives or nurses) regarding breastfeeding was not captured in the  
291 dataset; therefore, the extent of breastfeeding counselling and support provided during antenatal  
292 and early postpartum periods could not be established. Since the outcome of the study was  
293 assessed based on the women's responses regarding the timing of breastfeeding initiation, results  
294 may have been influenced by self-report and social desirability biases. Furthermore, the DHS did  
295 not collect some information, such as maternal beliefs and knowledge about breastfeeding, so  
296 there may be residual confounding.

## 297 **Conclusion**

298 Early initiation of breastfeeding within one hour after birth is beneficial in reducing neonatal  
299 mortality and preventing other neonatal illnesses. This study found that one in four women  
300 delayed early breastfeeding initiation. Factors significantly associated with delayed initiation of  
301 breastfeeding include unplanned pregnancies, media exposure, region, caesarean section, and  
302 poor newborn skin-to-skin contact immediately after birth. Interventions to promote optimal  
303 breastfeeding require a multi-sectoral approach, as well as bolstering health workers' capacity to  
304 encourage and support early initiation of breastfeeding during the antenatal and early postnatal  
305 periods. This could increase breastfeeding initiation rates at birth and prevent adverse neonatal  
306 outcomes in PNG.

## 307 **Data Availability Statement**

308 The data underlying the results presented in the study are available from the DHS Program:  
309 <https://dhsprogram.com/methodology/survey/survey-display-499.cfm>.

## 310 **Acknowledgements**

311 The authors acknowledge the DHS Program for making the datasets available for this analysis  
312 and the women who participated in the surveys.

## 313 **Contributors**

314 MM conceived and designed the study protocol. MM prepared the data, performed the statistical  
315 data analysis and produced the tables and figures. MM, FP and LMV interpreted the data. MM



316 drafted the manuscript. FP and LMV critically revised and edited the manuscript for important  
317 intellectual content. All authors read and approved the final manuscript. MM is the guarantor and  
318 accepts full responsibility for the work.

## 319 **Funding**

320 The authors have not declared a specific grant for this research from any funding agency in the  
321 public, commercial or not-for-profit sectors.

## 322 **Competing interests**

323 None declared.

## 324 **Patient consent for publication**

325 Not applicable.

## 326 **Ethics approval**

327 The 2016–2018 PNGDHS protocol was reviewed and approved by the Institutional Review  
328 Board of Inner-City Fund (ICF) International (530 Gaither Road, Suite 500 Rockville, MD  
329 20850, USA). The dataset was accessed through the DHS program website  
330 (<https://www.dhsprogram.com/data>) after the user’s agreement and approval for use were  
331 completed. The data used in this study were de-identified to ensure anonymity. Informed consent  
332 was obtained from all participants before the survey was conducted. Therefore, no additional  
333 ethical approval was sought for this study.

## 334 **Provenance and peer review**

335 Not commissioned; externally peer-reviewed

## 336 **ORCID iD**

337 McKenzie Maviso <https://orcid.org/0000-0001-5435-7054>

338 Francis Pulsan <https://orcid.org/0000-0002-2304-9566>

339 Lisa M. Valley <https://orcid.org/0000-0002-8247-7683>

340

## 341 **References**

- 342 [dataset] 1. NEOVITA Study Group. Timing of initiation, patterns of breastfeeding, and  
343 infant survival: prospective analysis of pooled data from three randomised trials. *The*  
344 *Lancet Global Health*. 2016 Apr 1;4(4):e266–75.
- 345 [dataset] 2. Victora CG, Bahl R, Barros AJD, França GVA, Horton S, Krasevec J, et al.  
346 Breastfeeding in the 21st century: epidemiology, mechanisms, and lifelong effect. *The*  
347 *Lancet*. 2016 Jan 30;387(10017):475–90.
- 348 [dataset] 3. WHO/UNICEF. Capture the Moment – Early initiation of breastfeeding: The best  
349 start for every newborn [Internet]. 2018. Available from:  
350 <https://data.unicef.org/resources/capture-the-moment/>
- 351 [dataset] 4. Raihana S, Alam A, Huda TM, Dibley MJ. Factors associated with delayed  
352 initiation of breastfeeding in health facilities: secondary analysis of Bangladesh  
353 demographic and health survey 2014. *International Breastfeeding Journal*. 2021 Jan  
354 22;16(1):14.
- 355 [dataset] 5. Abedi P, Jahanfar S, Namvar F, Lee J. Breastfeeding or nipple stimulation for  
356 reducing postpartum haemorrhage in the third stage of labour. *Cochrane Database of*  
357 *Systematic Reviews* [Internet]. 2016;(1). Available from:  
358 <https://doi.org/10.1002/14651858.CD010845.pub2>
- 359 [dataset] 6. Duale A, Singh P, Al Khodor S. Breast milk: a meal worth having. *Frontiers in*  
360 *Nutrition*. 2022;8:800927.
- 361 [dataset] 7. Khan J, Vesel L, Bahl R, Martines JC. Timing of Breastfeeding Initiation and  
362 Exclusivity of Breastfeeding During the First Month of Life: Effects on Neonatal Mortality  
363 and Morbidity—A Systematic Review and Meta-analysis. *Maternal and Child Health*  
364 *Journal*. 2015 Mar 1;19(3):468–79.
- 365 [dataset] 8. Morris A. Breastfeeding reduces risk of type 2 diabetes mellitus. *Nature Reviews*  
366 *Endocrinology*. 2018 Mar 1;14(3):128–128.
- 367 [dataset] 9. Jelly P, Choudhary S. Breastfeeding and breast cancer: A risk reduction strategy.  
368 *IP Int J Med Paediatr Oncol*. 2019;5(2):47–50.
- 369 [dataset] 10. Bruno Tongun J, Sebit MB, Mukunya D, Ndeezi G, Nankabirwa V, Tylleskar T,  
370 et al. Factors associated with delayed initiation of breastfeeding: a cross-sectional study in  
371 South Sudan. *International Breastfeeding Journal*. 2018 Jul 5;13(1):28.
- 372 [dataset] 11. Smith ER, Hurt L, Chowdhury R, Sinha B, Fawzi W, Edmond KM, et al. Delayed  
373 breastfeeding initiation and infant survival: A systematic review and meta-analysis. *PLOS*  
374 *ONE*. 2017 Jul 26;12(7):e0180722.

- 375 [dataset] 12. Seidu AA, Ahinkorah BO, Agbaglo E, Dadzie LK, Tetteh JK, Ameyaw EK, et al.  
376 Determinants of early initiation of breastfeeding in Papua New Guinea: a population-based  
377 study using the 2016-2018 demographic and health survey data. *Archives of Public Health*.  
378 2020 Nov 23;78(1):124.
- 379 [dataset] 13. Maviso MK, Kaforau LM, Hastie C. Influence of grandmothers on breastfeeding  
380 practices in a rural community in Papua New Guinea: A critical discourse analysis of first-  
381 time mothers' perspectives. *Women and Birth*. 2023;36(2):e263–9.
- 382 [dataset] 14. Maviso MK, Ferguson B, Kaforau LM, Capper T. A qualitative descriptive  
383 inquiry into factors influencing early weaning and breastfeeding duration among first-time  
384 mothers in Papua New Guinea's rural eastern highlands. *Women and Birth*.  
385 2022;35(1):e68–74.
- 386 [dataset] 15. Terry B, Kebio L, Kuzma J. Knowledge, attitude and practice of mothers towards  
387 breastfeeding in rural Papua New Guinea: a mixed method study. *Papua New Guinea*  
388 *Medical Journal*. 2015;58(1/4):22.
- 389 [dataset] 16. Kuzma J. Knowledge, attitude and practice related to infant feeding among  
390 women in rural Papua New Guinea: a descriptive, mixed method study. *International*  
391 *Breastfeeding Journal*. 2013 Nov 21;8(1):16.
- 392 [dataset] 17. National Department of Health. Infant & Young Child Feeding Policy 2014. Port  
393 Moresby, Papua New Guinea: National Department of Health; 2014.
- 394 [dataset] 18. National Statistical Office (NSO) [Papua New Guinea], ICF. Papua New Guinea  
395 Demographic and Health Survey 2016-18 [Internet]. Port Moresby, Papua New Guinea, and  
396 Rockville, Maryland, USA: NSO and ICF; 2019. Available from:  
397 <https://www.dhsprogram.com/pubs/pdf/FR364/FR364.pdf>
- 398 [dataset] 19. Kambale RM, Buliga JB, Isia NF, Muhimuzi AN, Battisti O, Mungo BM.  
399 Delayed initiation of breastfeeding in Bukavu, South Kivu, eastern Democratic Republic of  
400 the Congo: a cross-sectional study. *International Breastfeeding Journal*. 2018 Feb  
401 13;13(1):6.
- 402 [dataset] 20. Archer KJ, Lemeshow S, Hosmer DW. Goodness-of-fit tests for logistic  
403 regression models when data are collected using a complex sampling design.  
404 *Computational Statistics & Data Analysis*. 2007 May 15;51(9):4450–64.
- 405 [dataset] 21. Bruno Tongun J, Sebit MB, Mukunya D, Ndeezi G, Nankabirwa V, Tylleskar T,  
406 et al. Factors associated with delayed initiation of breastfeeding: a cross-sectional study in  
407 South Sudan. *International Breastfeeding Journal*. 2018 Jul 5;13(1):28.
- 408 [dataset] 22. Mukunya D, Tumwine JK, Nankabirwa V, Ndeezi G, Odongo I, Tumuhamy J, et  
409 al. Factors associated with delayed initiation of breastfeeding: a survey in Northern Uganda.  
410 *Global Health Action*. 2017 Jan 1;10(1):1410975.

- 411 [dataset] 23. Teshale AB, Tesema GA. Timely initiation of breastfeeding and associated  
412 factors among mothers having children less than two years of age in sub-Saharan Africa: A  
413 multilevel analysis using recent Demographic and Health Surveys data. PLOS ONE. 2021  
414 Mar 23;16(3):e0248976.
- 415 [dataset] 24. Bekele H, Dheressa M, Mengistie B, Sintayehu Y, Fekadu G. Unintended  
416 Pregnancy and Associated Factors among Pregnant Women Attending Antenatal Care at  
417 Bako Tibe District Public Health Facility, Oromia Region, Ethiopia. Balayla J, editor.  
418 Journal of Pregnancy. 2020 Mar 19;2020:3179193.
- 419 [dataset] 25. Hromi-Fiedler AJ, Pérez-Escamilla R. Unintended pregnancies are associated  
420 with less likelihood of prolonged breast-feeding: an analysis of 18 Demographic and Health  
421 Surveys. Public Health Nutrition. 2007/01/02 ed. 2006;9(3):306–12.
- 422 [dataset] 26. Sharma M, Anand A, Goswami I, Pradhan MR. Factors associated with delayed  
423 initiation and non-exclusive breastfeeding among children in India: evidence from national  
424 family health survey 2019-21. International Breastfeeding Journal. 2023 Jun 6;18(1):28.
- 425 [dataset] 27. Kusasira L, Mukunya D, Obakiro S, Kenedy K, Rebecca N, Ssenyonga L, et al.  
426 Prevalence and predictors of delayed initiation of breastfeeding among postnatal women at  
427 a tertiary hospital in Eastern Uganda: a cross-sectional study. Archives of Public Health.  
428 2023 Apr 14;81(1):56.
- 429 [dataset] 28. Tongun JB, Sebit MB, Ndeezi G, Mukunya D, Tylleskar T, Tumwine JK.  
430 Prevalence and determinants of pre-lacteal feeding in South Sudan: a community-based  
431 survey. Global Health Action. 2018 Jan 1;11(1):1523304.
- 432 [dataset] 29. Hobbs AJ, Mannion CA, McDonald SW, Brockway M, Tough SC. The impact of  
433 caesarean section on breastfeeding initiation, duration and difficulties in the first four  
434 months postpartum. BMC Pregnancy and Childbirth. 2016 Apr 26;16(1):90.
- 435 [dataset] 30. Cobb B, Liu R, Valentine E, Onuoha O. Breastfeeding after Anesthesia: A  
436 Review for Anesthesia Providers Regarding the Transfer of Medications into Breast Milk.  
437 Transl Perioper Pain Med. 2015;1(2):1–7.
- 438 [dataset] 31. Mitchell J, Jones W, Winkley E, Kinsella SM. Guideline on anaesthesia and  
439 sedation in breastfeeding women 2020. Anaesthesia. 2020 Nov 1;75(11):1482–93.
- 440 [dataset] 32. Oakley L, Benova L, Macleod D, Lynch CA, Campbell OMR. Early  
441 breastfeeding practices: Descriptive analysis of recent Demographic and Health Surveys.  
442 Maternal & Child Nutrition. 2018 Apr 1;14(2):e12535.
- 443 [dataset] 33. Oyedele OK. Correlates of non-institutional delivery to delayed initiation of  
444 breastfeeding in Nigeria: logit-decomposition and subnational analysis of population-based  
445 survey. Journal of Health, Population and Nutrition. 2023 Nov 6;42(1):121.

- 446 [dataset] 34. Aboagye RG, Okyere J, Dowou RK, Adzigbli LA, Tackie V, Ahinkorah BO, et  
447 al. Prevalence and predictors of mother and newborn skin-to-skin contact at birth in Papua  
448 New Guinea. *BMJ Open*. 2022 Sep 5;12(9):e062422.
- 449 [dataset] 35. Wilson AN, Melepia P, Suruka R, Hezeri P, Kabiu D, Babona D, et al. Quality  
450 newborn care in East New Britain, Papua New Guinea: measuring early newborn care  
451 practices and identifying opportunities for improvement. *BMC Pregnancy and Childbirth*.  
452 2022 Jun 1;22(1):462.
- 453 [dataset] 36. Appiah F, Ahinkorah BO, Budu E, Oduro JK, Sambah F, Baatiema L, et al.  
454 Maternal and child factors associated with timely initiation of breastfeeding in sub-Saharan  
455 Africa. *International Breastfeeding Journal*. 2021 Jul 19;16(1):55.
- 456 [dataset] 37. Mishel Unar-Munguía, Andrea Santos-Guzmán, Pedro Javier Mota-Castillo,  
457 Marena Ceballos-Rasgado, Lizbeth Tolentino-Mayo, Matthias Sachse Aguilera, et al.  
458 Digital marketing of formula and baby food negatively influences breast feeding and  
459 complementary feeding: a cross-sectional study and video recording of parental exposure in  
460 Mexico. *BMJ Global Health*. 2022 Nov 1;7(11):e009904.
- 461 [dataset] 38. Henjum S, Mathisen R, Nguyen TT, Phan LTH, Ribe LO, Vinje KH. Media audit  
462 reveals inappropriate promotion of products under the scope of the International Code of  
463 Marketing of Breast-milk Substitutes in South-East Asia. *Public Health Nutrition*.  
464 2017/03/15 ed. 2017;20(8):1333–42.
- 465 [dataset] 39. Frerichs L, Andsager JL, Campo S, Aquilino M, Dyer CS. Framing Breastfeeding  
466 and Formula-Feeding Messages in Popular U.S. Magazines. *Women & Health*. 2006 Nov  
467 28;44(1):95–118.
- 468 [dataset] 40. Merritt R, Eida T, Safon C, Kendall S. Print media coverage of breastfeeding in  
469 Great Britain: Positive or negative? *Maternal & Child Nutrition*. 2023 Jan 1;19(S1):e13458.
- 470 [dataset] 41. Hitt R, Zhuang J, Anderson J. Media Presentation of Breastfeeding Beliefs in  
471 Newspapers. *Health Communication*. 2018 Oct 3;33(10):1293–301.
- 472 [dataset] 42. Seidu AA, Agbaglo E, Dadzie LK, Ahinkorah BO, Ameyaw EK, Tetteh JK.  
473 Individual and contextual factors associated with barriers to accessing healthcare among  
474 women in Papua New Guinea: insights from a nationwide demographic and health survey.  
475 *International Health*. 2021 Nov 1;13(6):573–85.
- 476 [dataset] 43. Li Y, Li H, Jiang Y. Factors influencing maternal healthcare utilization in Papua  
477 New Guinea: Andersen’s behaviour model. *BMC Women’s Health*. 2023 Oct 21;23(1):544.
- 478 [dataset] 44. Raihana S, Alam A, Chad N, Huda TM, Dibley MJ. Delayed Initiation of  
479 Breastfeeding and Role of Mode and Place of Childbirth: Evidence from Health Surveys in  
480 58 Low- and Middle- Income Countries (2012–2017). *International Journal of  
481 Environmental Research and Public Health*. 2021;18(11).

482 [dataset] 45. Hector D, King L, Webb K, Heywood P. Factors affecting breastfeeding  
483 practices. Applying a conceptual framework. NSW Public Health Bull. 2005;16(4):52–5.

484

485 **Figure 1** A conceptual framework of individual and group-level factors associated with  
486 delayed initiation of breastfeeding in PNG. Adapted from previous studies.<sup>44,45</sup>

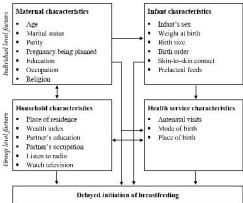

Source: https://medrxiv.org/content/10.1101/2024.09.18.24313839v1.full.pdf
